# Supplementary material for: The glutamate release inhibitor riluzole increases DNA damage and enhances cytotoxicity in human glioma cells, in vitro and in vivo
Source: PubMed Central journal article supplement (PMC6497458; doi:10.18632/oncotarget.26854), 2019-04-19
Supplement: oncotarget-10-2824-s001.pdf [file oncotarget-10-2824-s001.pdf]

# The glutamate release inhibitor riluzole increases DNA damage and enhances cytotoxicity in human glioma cells, *in vitro* and *in vivo*

## SUPPLEMENTARY MATERIALS

A

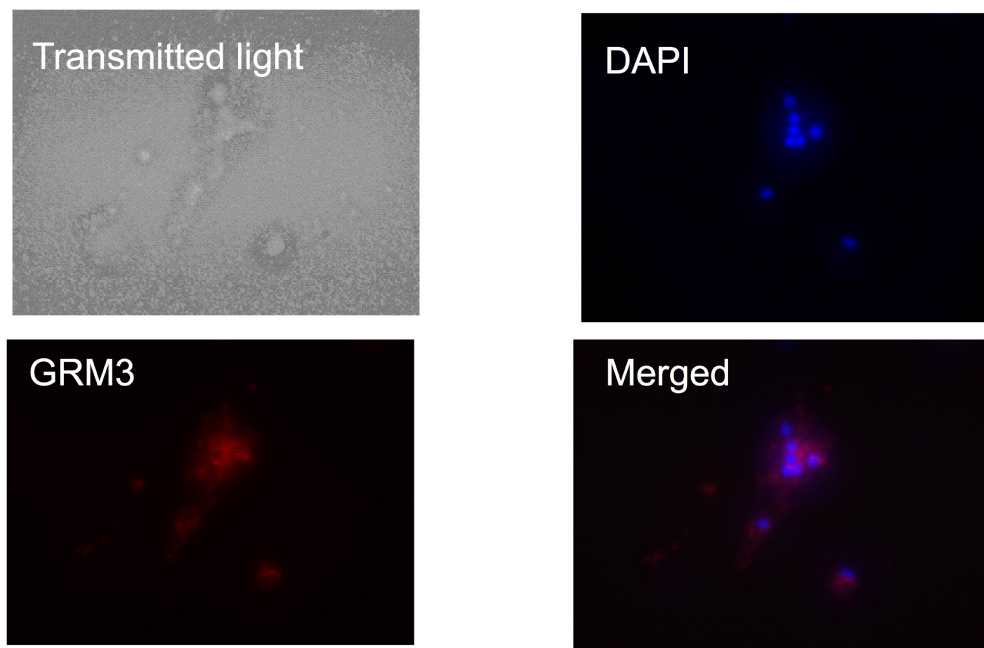

**Supplementary Figure 1: GRM3 is expressed in human gliomas.** Immunofluorescence demonstration of DAPI, rhodamine-GRM3 and merged of GRM3 and DAPI in an example of primary patient derived cells.

**A**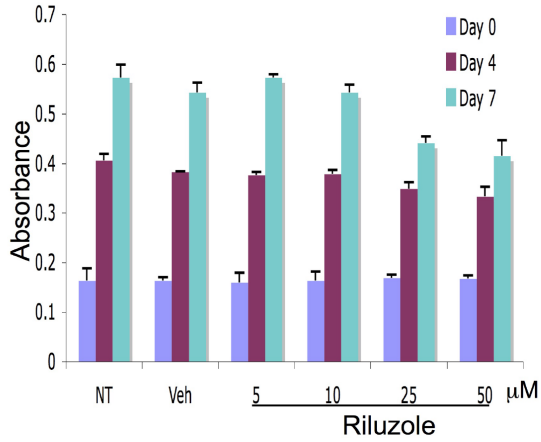**B**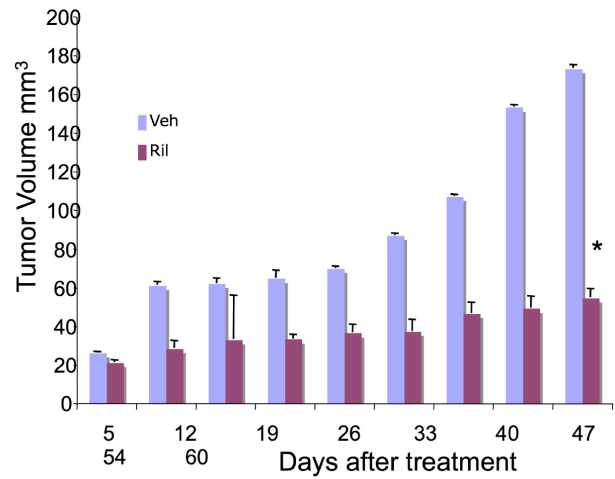

**Supplementary Figure 2: Cytotoxic effect of RIL on glioma cells.** (A) MTT cell viability/cell proliferation assays were performed with U118MG cells, the cells were either not treated (NT), treated with vehicle (Veh, DMSO) or riluzole at 5, 10, 25 or 50 mM for 7 days. (B) U118MG xenograft mice,  $10^6$  cells were injected subcutaneously into the dorsal flanks of each mouse, when the tumor volumes reach about  $10 \text{ mm}^3$  the mice were divided into groups with similar tumor volume distribution and treatment is then initiated. The groups are no treatment (NT), vehicle (Veh, DMSO) and riluzole (10 mg/kg), treatment was administered via oral gavage daily for 42 days. \* $p < 0.05$ , comparison of riluzole treated mice with either no treatment or vehicle treated ones.

**A**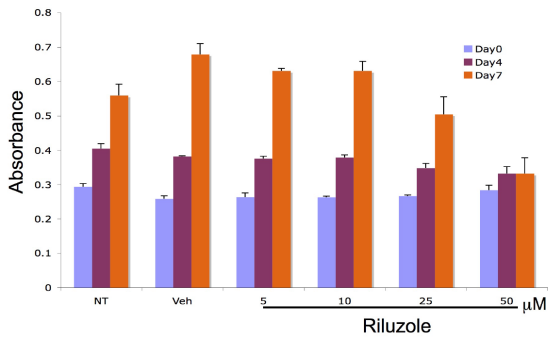**B**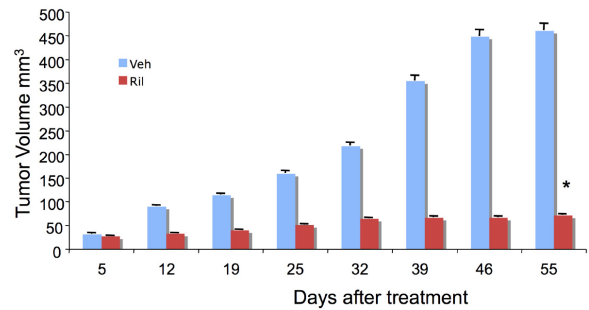

**Supplementary Figure 3: Cytotoxic effect of RIL on glioma cells.** (A) MTT cell viability/cell proliferation assays were performed with LN229 cells, the cells were either not treated (NT), treated with vehicle (Veh, DMSO) or riluzole at 5, 10, 25 or 50 mM for 7 days. (B) LN229 xenograft mice,  $10^6$  cells were injected subcutaneously into the dorsal flanks of each mouse, when the tumor volumes reach  $6\text{--}10 \text{ mm}^3$  the mice were divided into groups with similar tumor volume distribution and treatment is then initiated. The groups are no treatment (NT), vehicle (Veh, DMSO) and riluzole (10 mg/kg), treatment was administered via oral gavage daily for 42 days. \* $p < 0.0001$ , comparison of riluzole treated mice with either no treatment or vehicle treated ones.
